# Supplementary material for: NHC ligand-based half-sandwich iridium complexes: synthesis, structure and catalytic activity in acceptorless dehydrogenation and transfer hydrogenation
Source: Royal Society of Chemistry journal article supplement (doi:10.1039/d1nj03824a), 2021-01-01
Supplement: d1nj03824a1.pdf [file d1nj03824a1.pdf]

## Supporting Information

# NHC Ligand-Based Half-Sandwich Iridium Complexes: Synthesis, Structure and Catalytic Activity in Acceptorless Dehydrogenation and Transfer Hydrogenation

Rong-Jian Li,<sup>a,c</sup> Yang Wang,<sup>a</sup> Yan Jin,<sup>a,c</sup> Wei Deng,<sup>\*a</sup> Zhen-Jiang Liu,<sup>\*a</sup> Zi-Jian Yao,<sup>\*ab</sup>

<sup>a</sup> School of Chemical and Environmental Engineering, Shanghai Institute of Technology, Shanghai, 201418, China.

<sup>b</sup> Anhui Laboratory of Molecular-Based Materials, College of Chemistry and Materials Science, Anhui Normal University, Wuhu, 241002, China.

<sup>c</sup> State Key Laboratory of Transducer Technology, Shanghai Institute of Microsystem and Information Technology, Chinese Academy of Sciences, Shanghai, 200050, China

Corresponding author: Email: zjyao@sit.edu.cn; Tel: +86-21-60877231, Fax: +86-21-60873335.

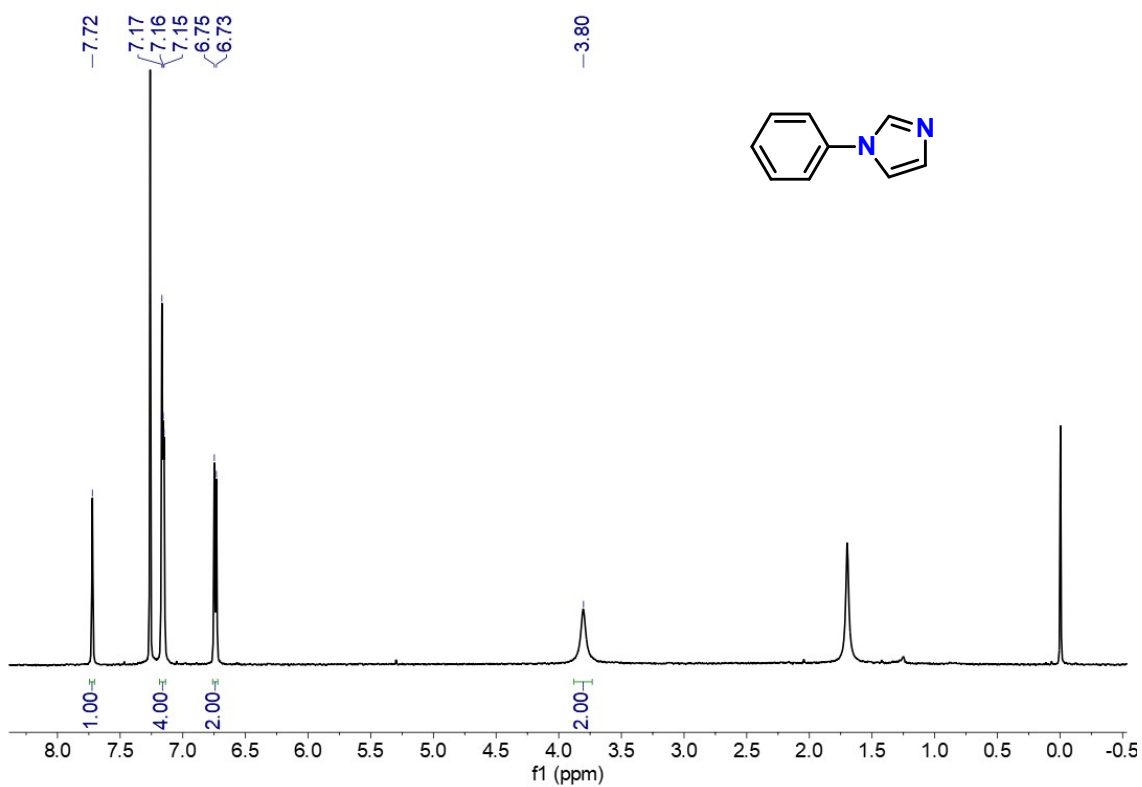

Figure S1.  $^1\text{H}$  NMR spectra of A1

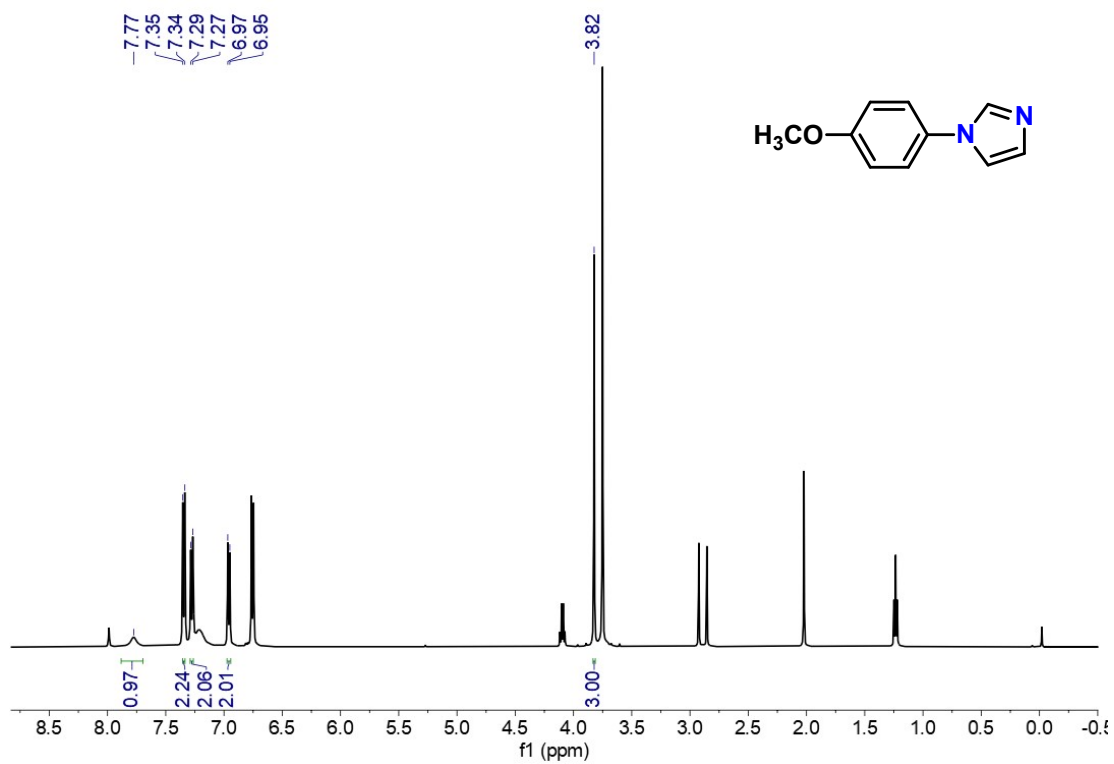

Figure S2.  $^1\text{H}$  NMR spectra of A2

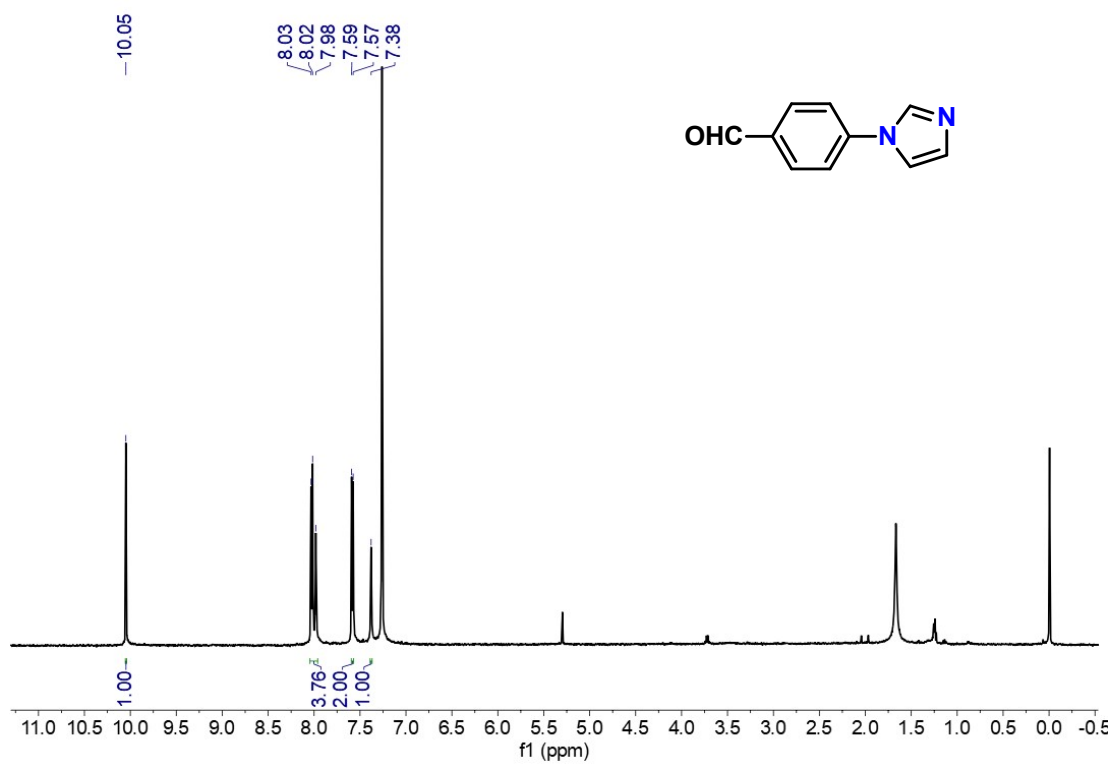

Figure S3. <sup>1</sup>H NMR spectra of **A3**

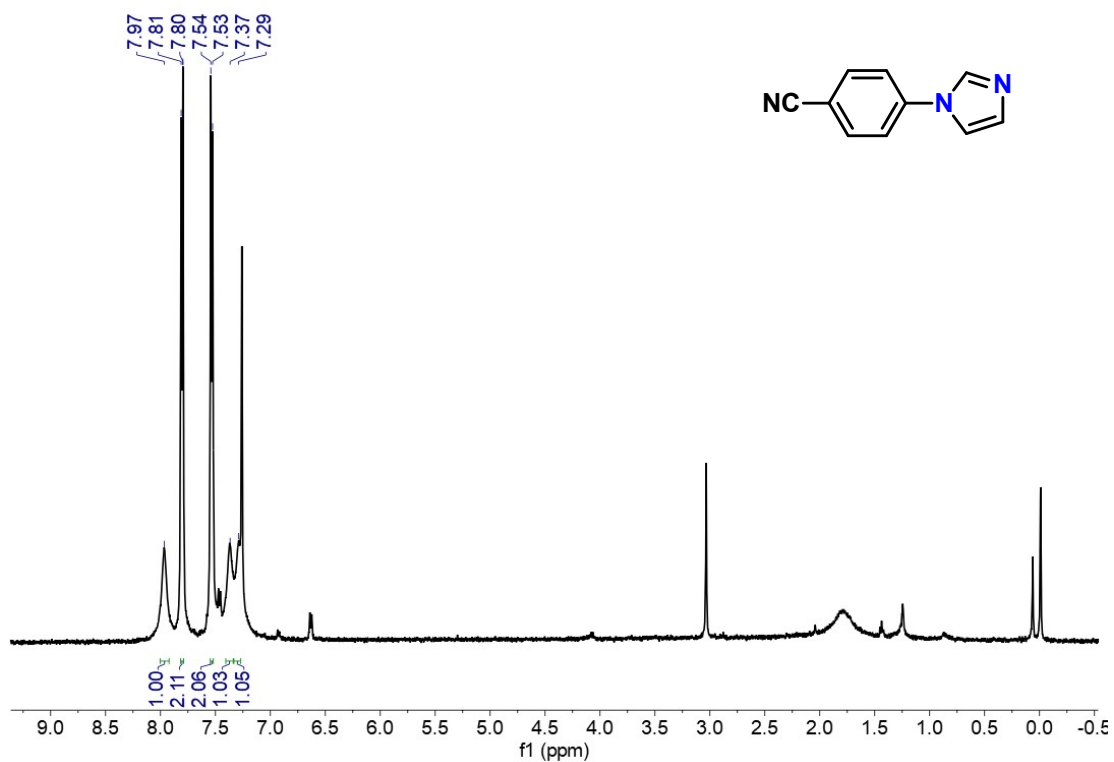

Figure S4. <sup>1</sup>H NMR spectra of **A4**

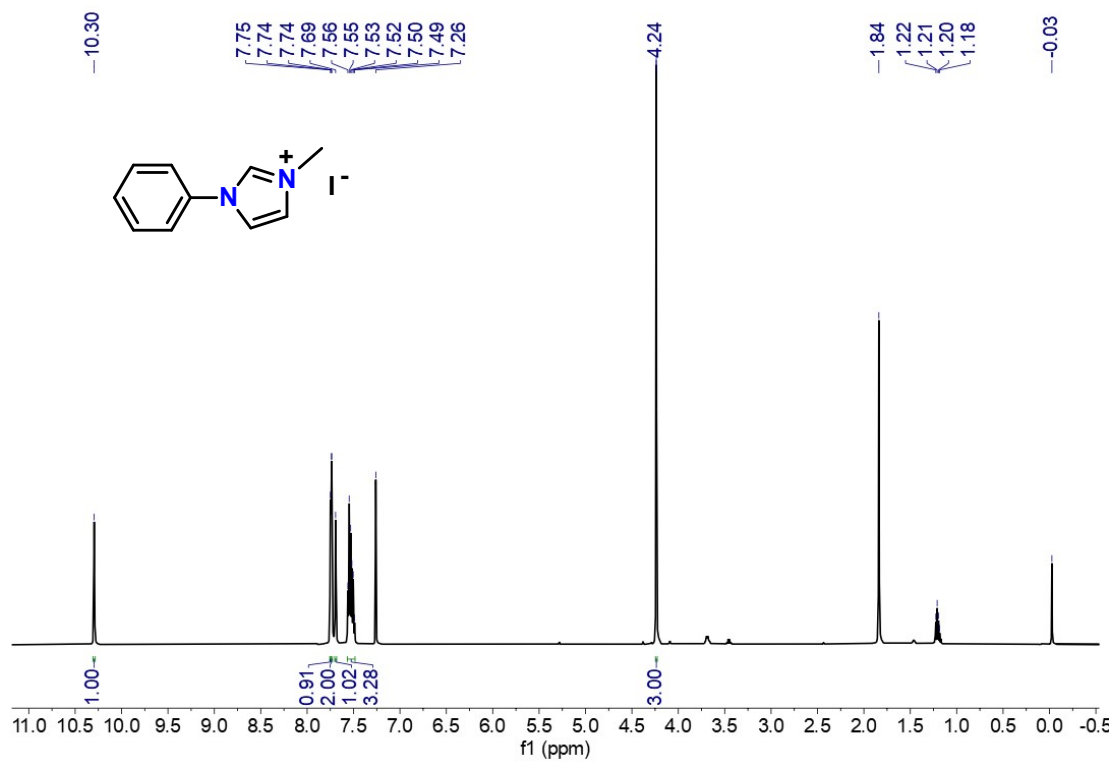

Figure S5. <sup>1</sup>H NMR spectra of L1

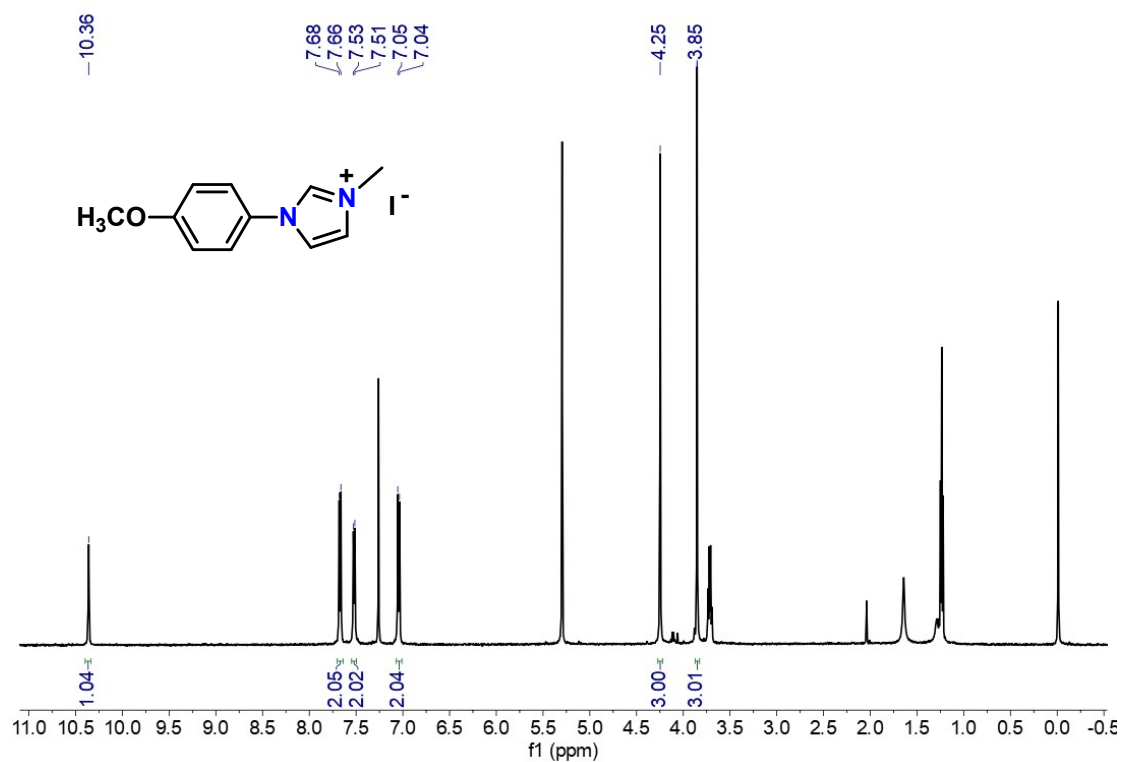

Figure S6. <sup>1</sup>H NMR spectra of L2

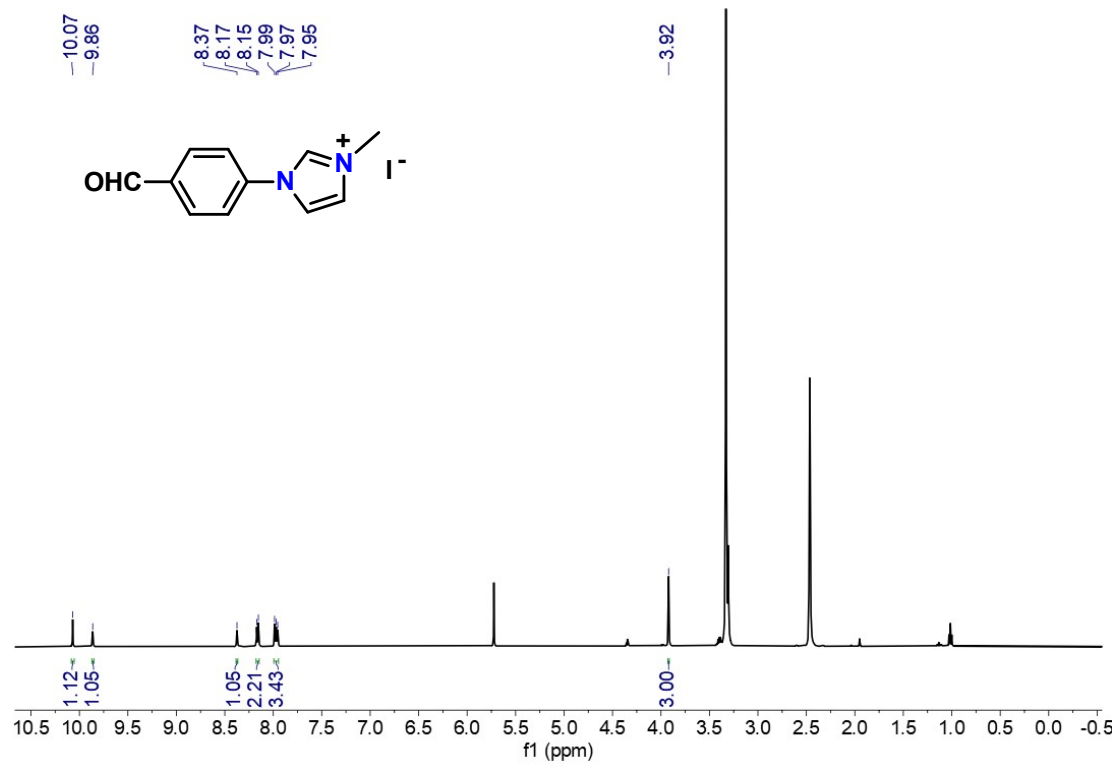

Figure S7. <sup>1</sup>H NMR spectra of L3

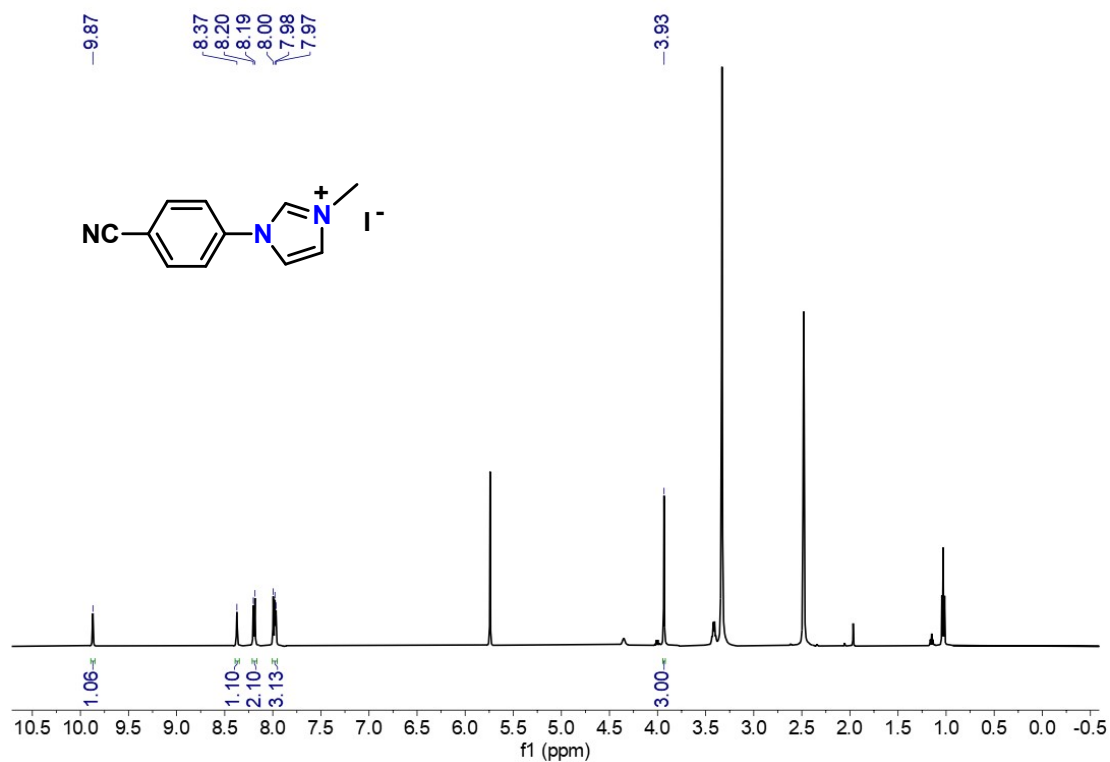

Figure S8. <sup>1</sup>H NMR spectra of L4

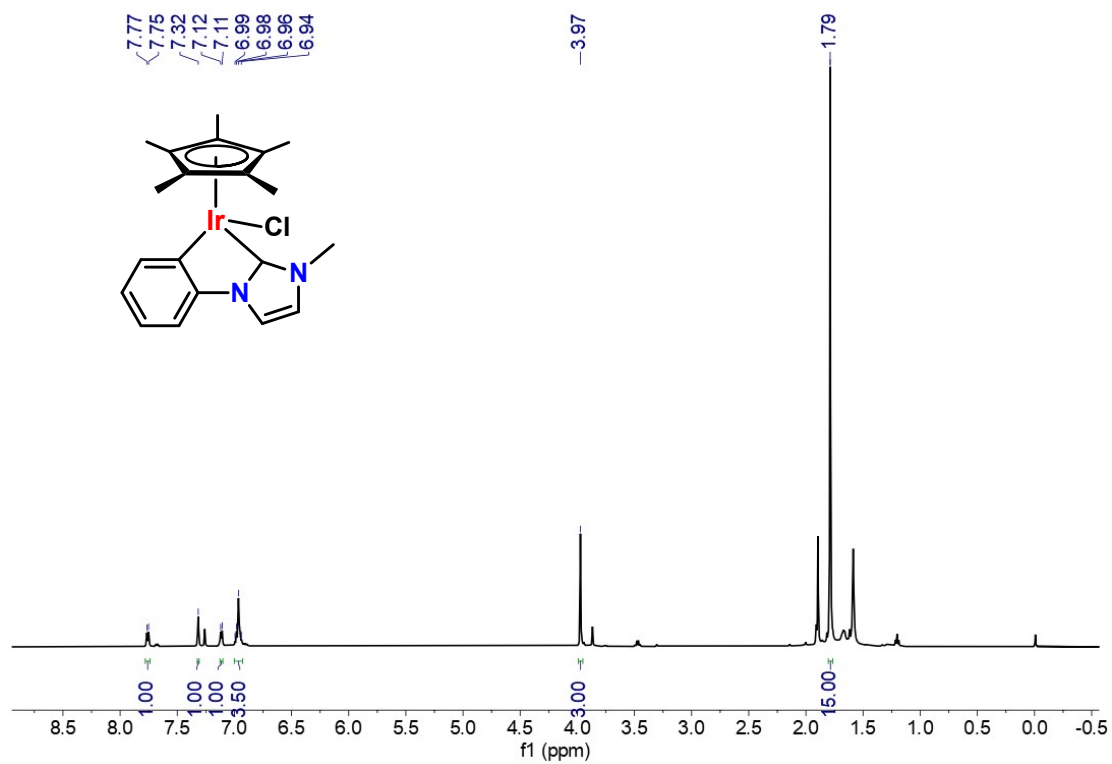

Figure S9.  $^1\text{H}$  NMR spectra of **1**

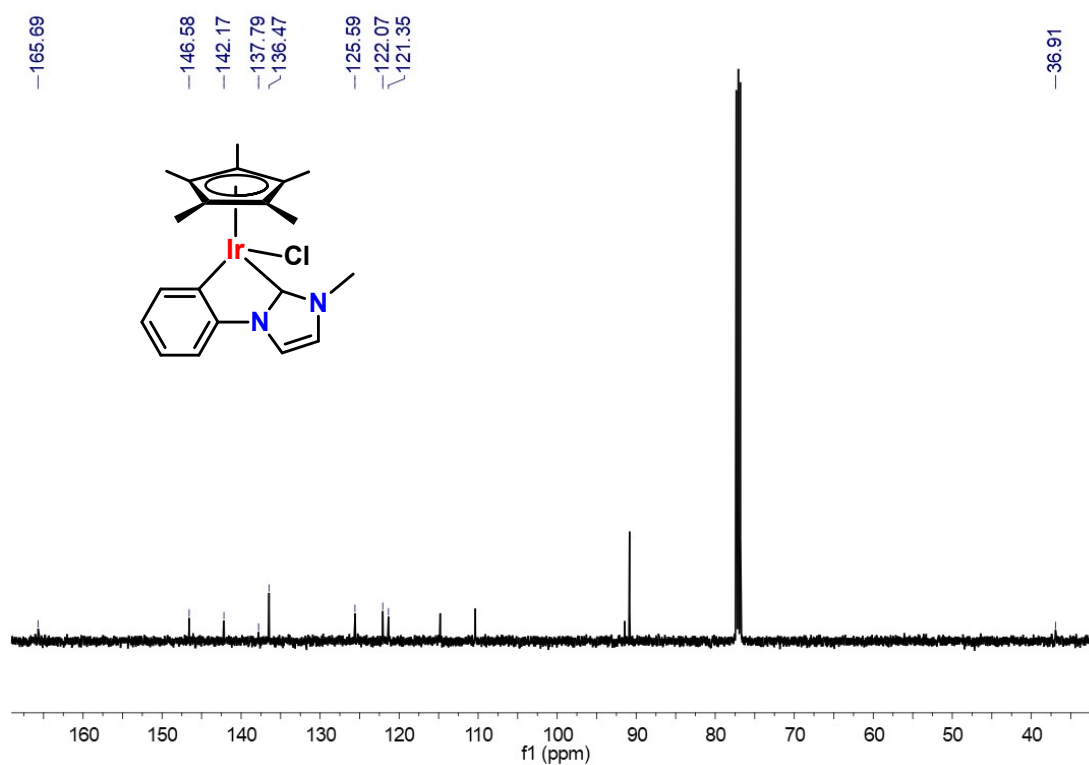

Figure S10.  $^{13}\text{C}$  NMR spectra of **1**

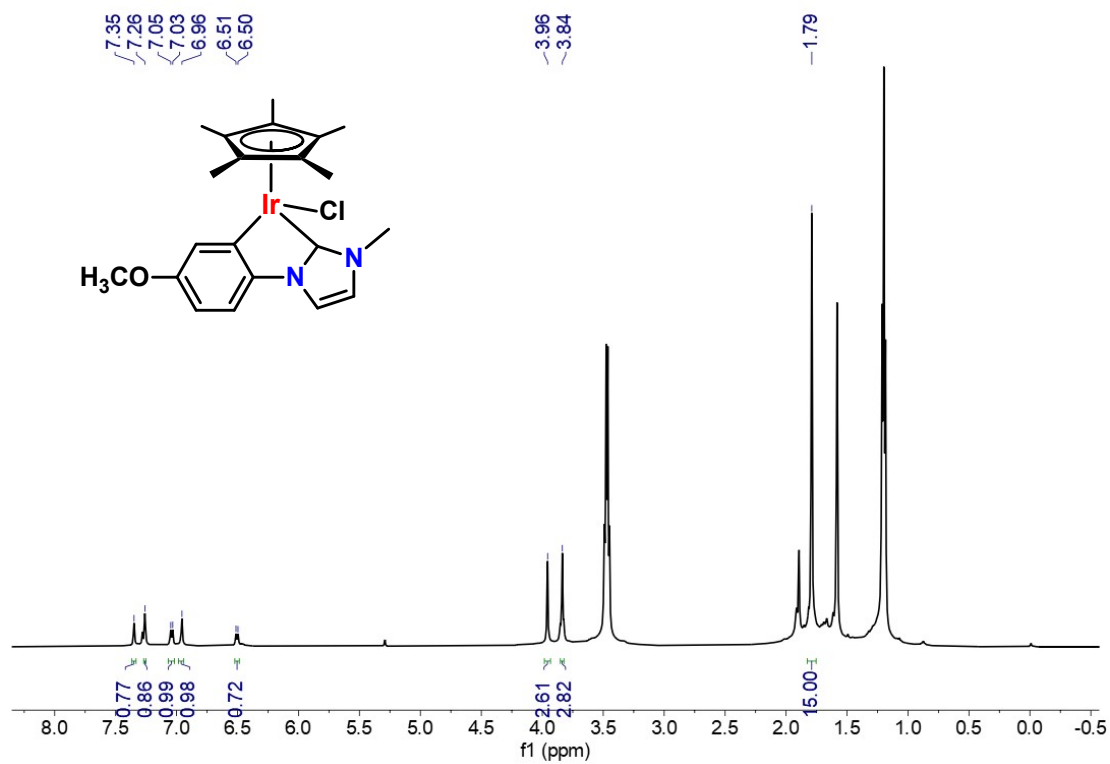

Figure S11. <sup>1</sup>H NMR spectra of **2**

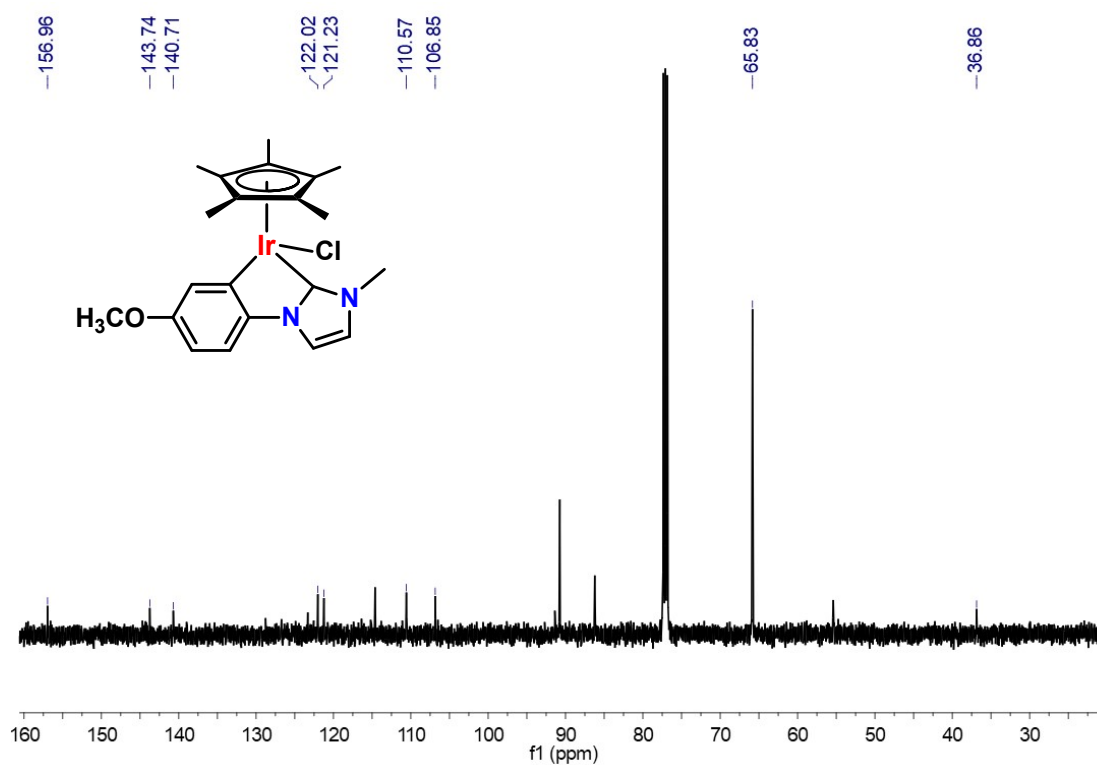

Figure S12. <sup>13</sup>C NMR spectra of **2**

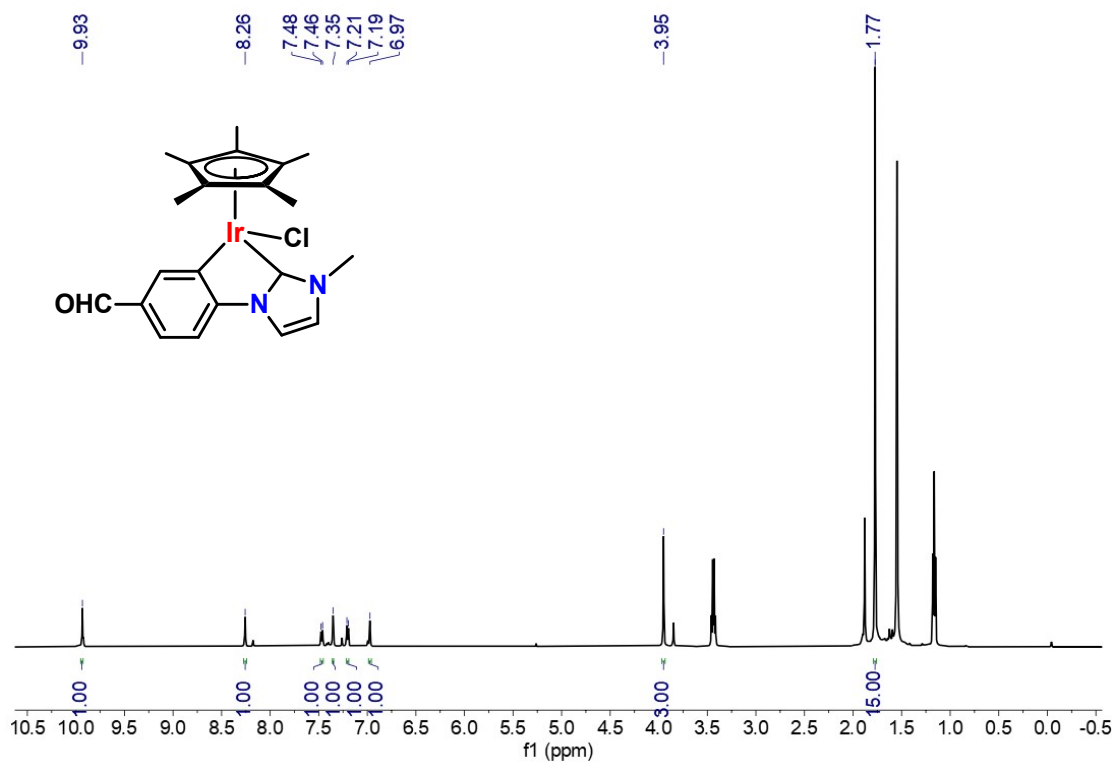

Figure S13.  $^1\text{H}$  NMR spectra of **3**

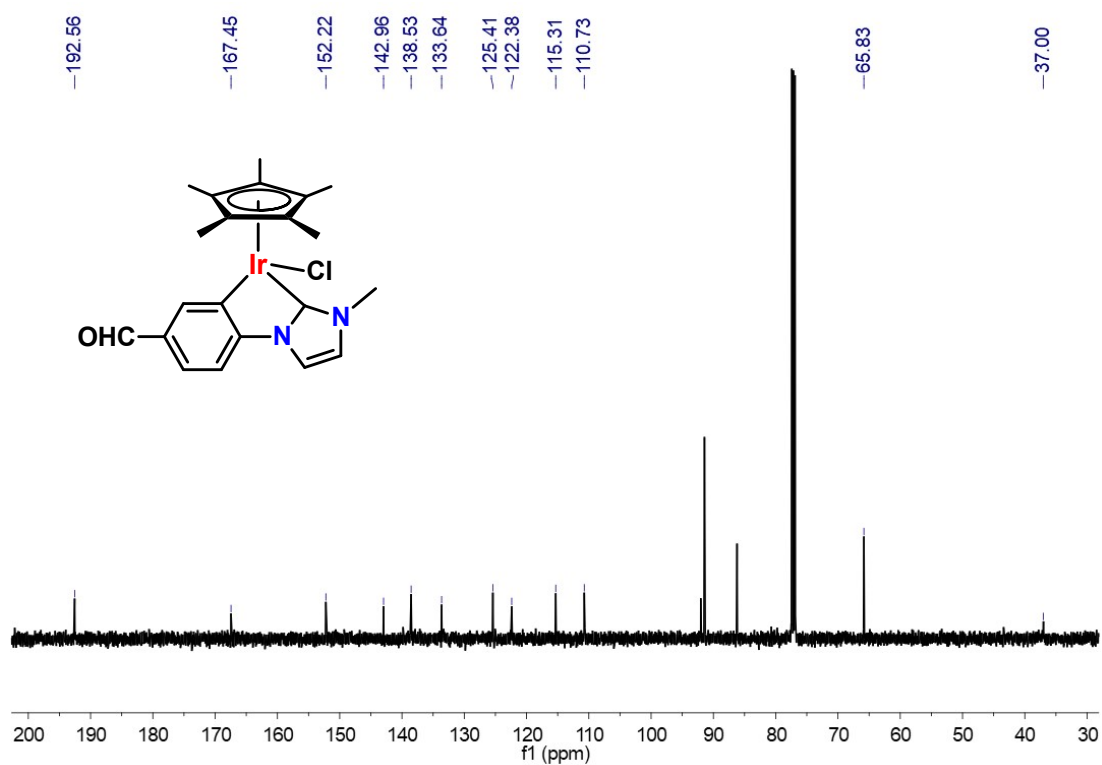

Figure S14.  $^{13}\text{C}$  NMR spectra of **3**



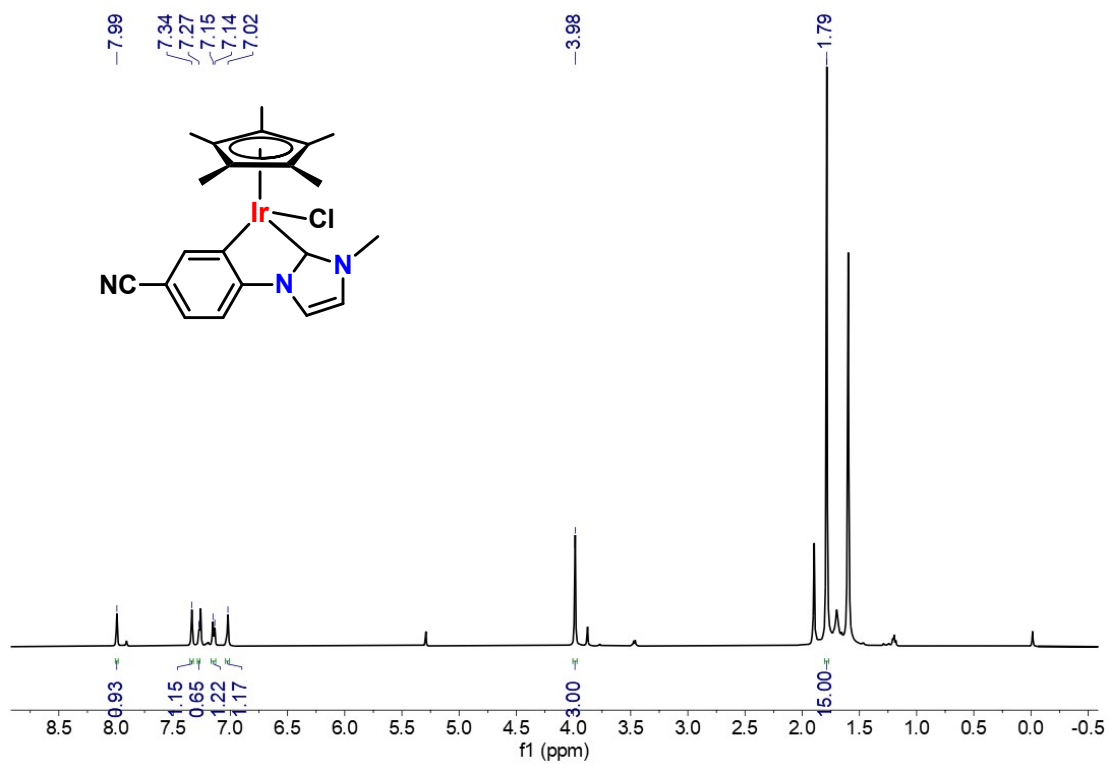

Figure S15.  $^1\text{H NMR}$  spectra of 4

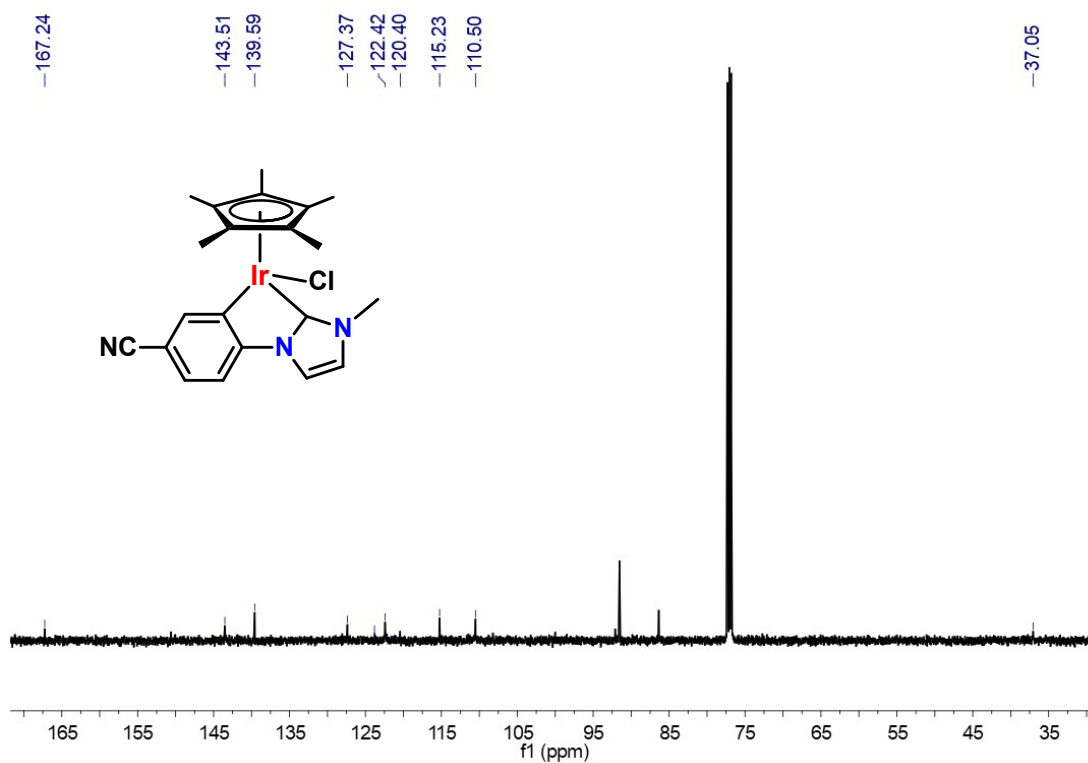

Figure S16.  $^{13}\text{C NMR}$  spectra of 4
